# Supplementary material for: Increasing preoperative body size in breast cancer patients between 2002 and 2016: implications for prognosis
Source: Springer Nature journal article supplement (doi:10.1007/s10552-018-1042-z), 2018-05-26

Supplementary figure 1

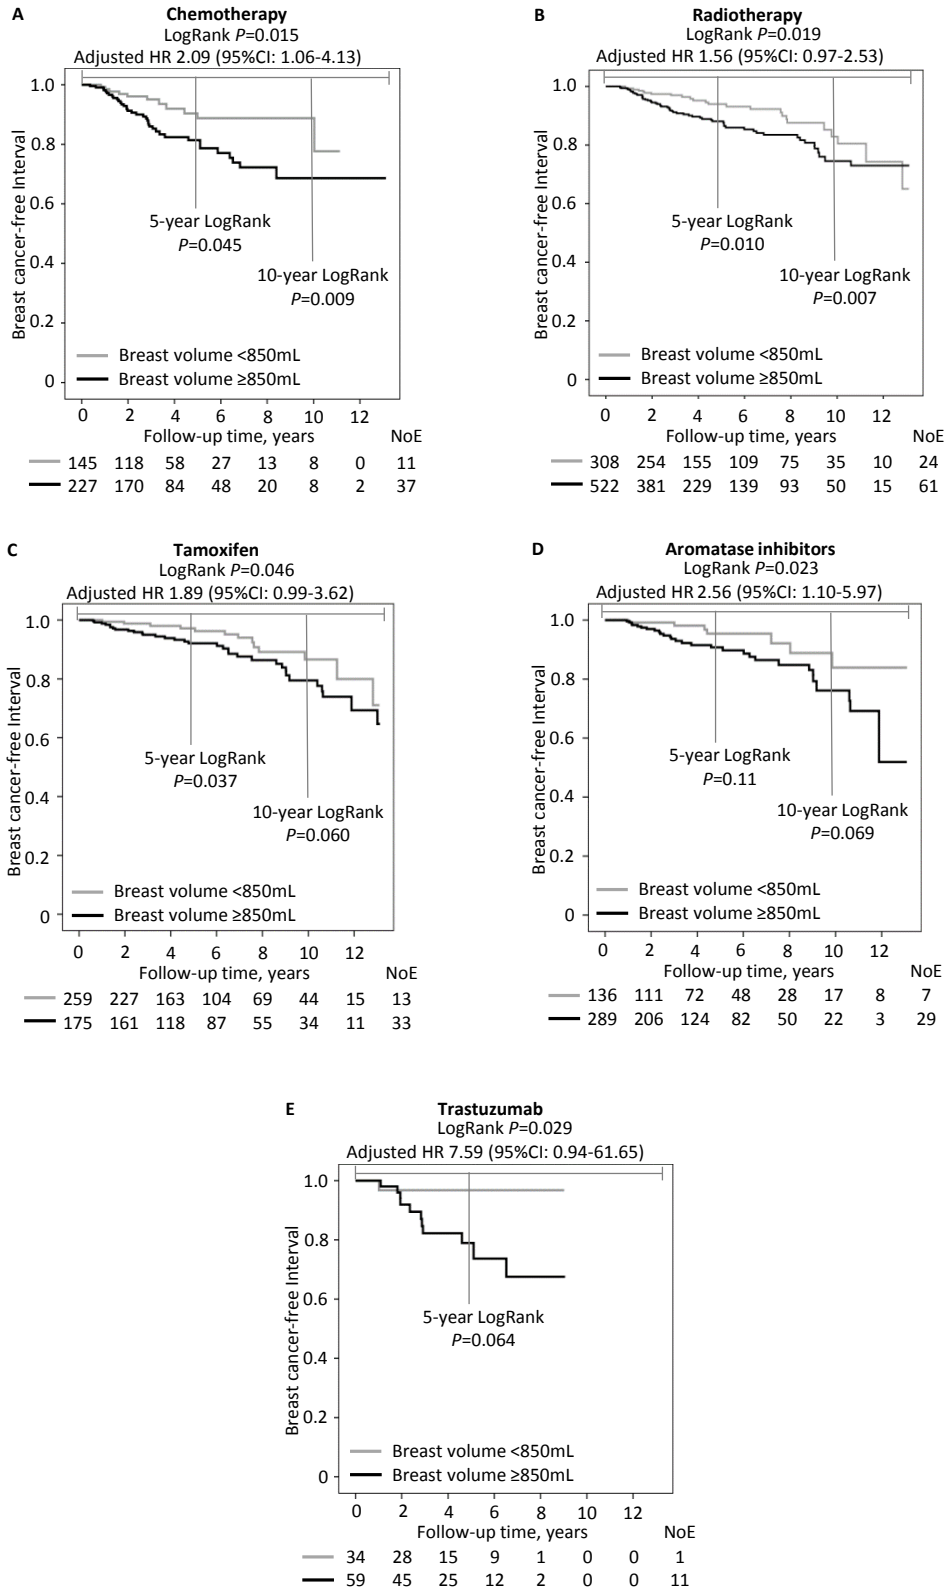

Supplement: MOESM1 [file 15795190]
